# Supplementary material for: RAId_aPS: MS/MS Analysis with Multiple Scoring Functions and Spectrum-Specific Statistics
Source: PubMed Central journal article supplement (PMC2982831; doi:10.1371/journal.pone.0015438), 2010-11-16
Supplement: pone.0015438.s003.pdf [file pone.0015438.s003.pdf]

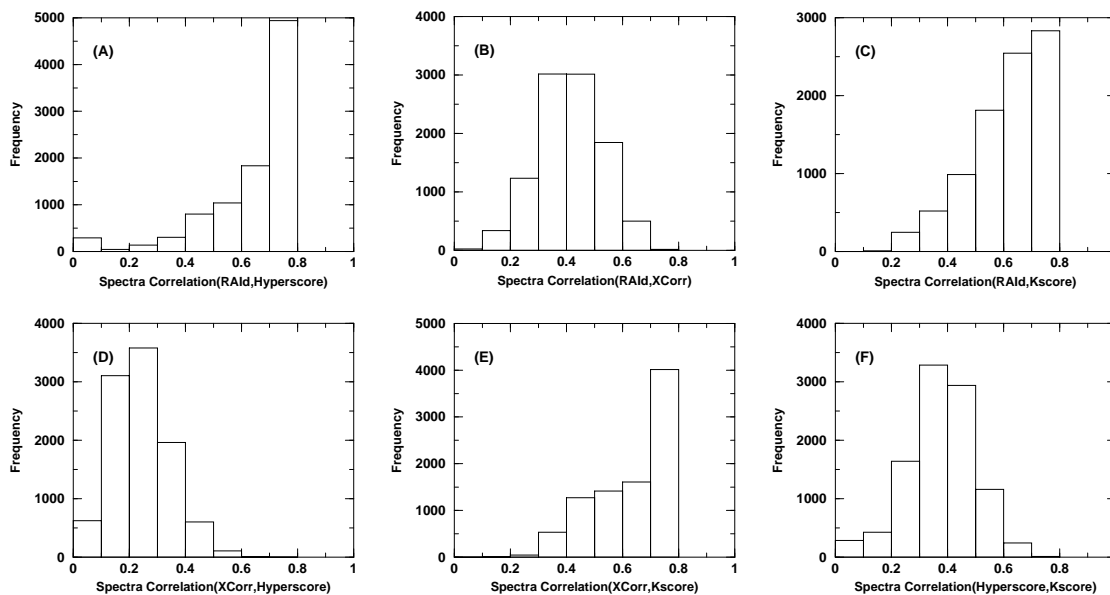

**Figure S2.** Histograms of correlations between filtering strategies. This Figure is the same as Figure 3 except that the 10,000 raw spectra used are profile data from the NHLBI data set. [1]

## References

1. Alves G, Ogurtsov AY, Wu WW, Wang G, Shen RF, et al. (2007) Calibrating E-values for MS<sup>2</sup> library search methods. *Biology Direct* 2: 26.
