# Supplementary material for: RAId_aPS: MS/MS Analysis with Multiple Scoring Functions and Spectrum-Specific Statistics
Source: PubMed Central journal article supplement (PMC2982831; doi:10.1371/journal.pone.0015438), 2010-11-16
Supplement: pone.0015438.s006.pdf [file pone.0015438.s006.pdf]

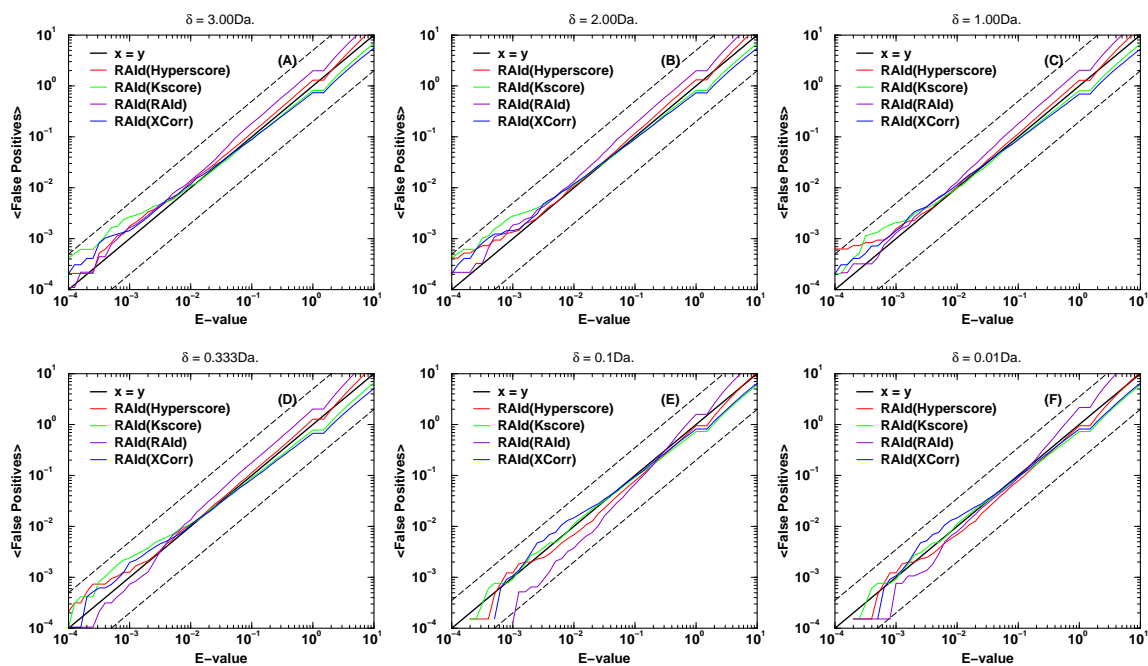

**Figure S5.** E-value accuracy assessment. The agreement between the reported  $E$ -value and the textbook definition is examined using profile data (the NHLBI data set: 10,000 spectra). The random database size used is 500 MB. The molecular weight range considered while searching the database is  $[MW - \delta, MW + \delta]$ . In each panel, the dashed lines, corresponding to  $x = 5y$  and  $x = y/5$ , are used to provide a visual guide regarding how close/off the experimental curves are from the theoretical curve.
