# Supplementary material for: RAId_aPS: MS/MS Analysis with Multiple Scoring Functions and Spectrum-Specific Statistics
Source: PubMed Central journal article supplement (PMC2982831; doi:10.1371/journal.pone.0015438), 2010-11-16
Supplement: pone.0015438.s010.pdf [file pone.0015438.s010.pdf]

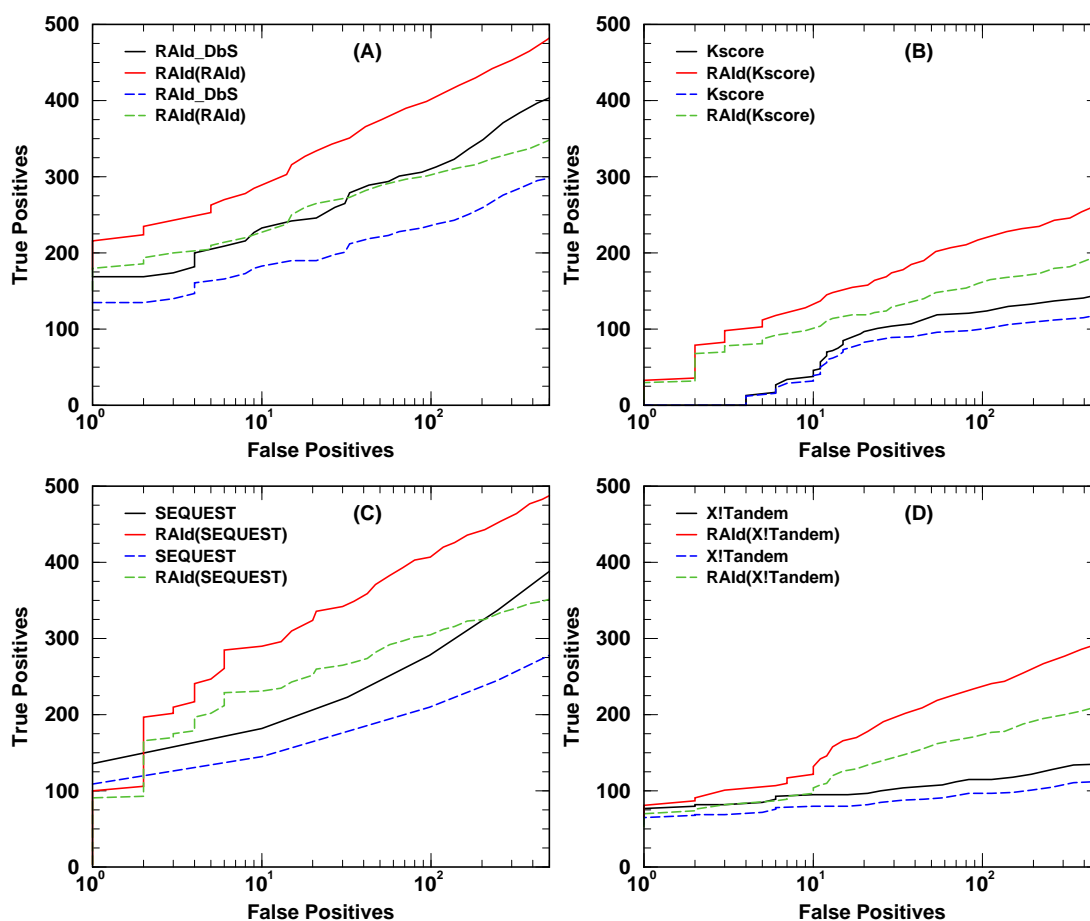

**Figure S9.** ROC curves when highly homologous proteins [1] are removed from the nr database and thus are not counted towards true positives or false positives. Each panel displays the results of a scoring function. The resulting ROC curves from using RAId\_aPS implementation and the original implementation in other search program are both shown. The results from profile data (NHLBI data set [2]) are shown in solid curves, while the results from centroid data (A1-A4 of ISB data set [3]) are shown in long-dash curves. Panels (A,B,C,D) respectively display the results from using RAId score, K-score, XCorr, and Hyperscore. The RAId\_aPS implemented scoring functions performs comparably to the original implementation in other search methods.

## References

1. Alves G, Ogurtsov AY, Yu YK (2007) RAId\_DbS: Peptide identification using database searches with realistic statistics. *Biology Direct* 2: 25.
2. Alves G, Ogurtsov AY, Wu WW, Wang G, Shen RF, et al. (2007) Calibrating E-values for MS<sup>2</sup> library search methods. *Biology Direct* 2: 26.
3. Keller A, Samuel P, Nesvizhskii AI, Stolyar S, Goodlett DR, et al. (2002) Experimental protein mixture for validating tandem mass spectral analysis. *OMICS* 6: 207-212.
